# Supplementary material
Source: publisher figshare collection journal article supplement (https://gsapubs.figshare.com/ndownloader/files/23299841)

By  
e and  
2015

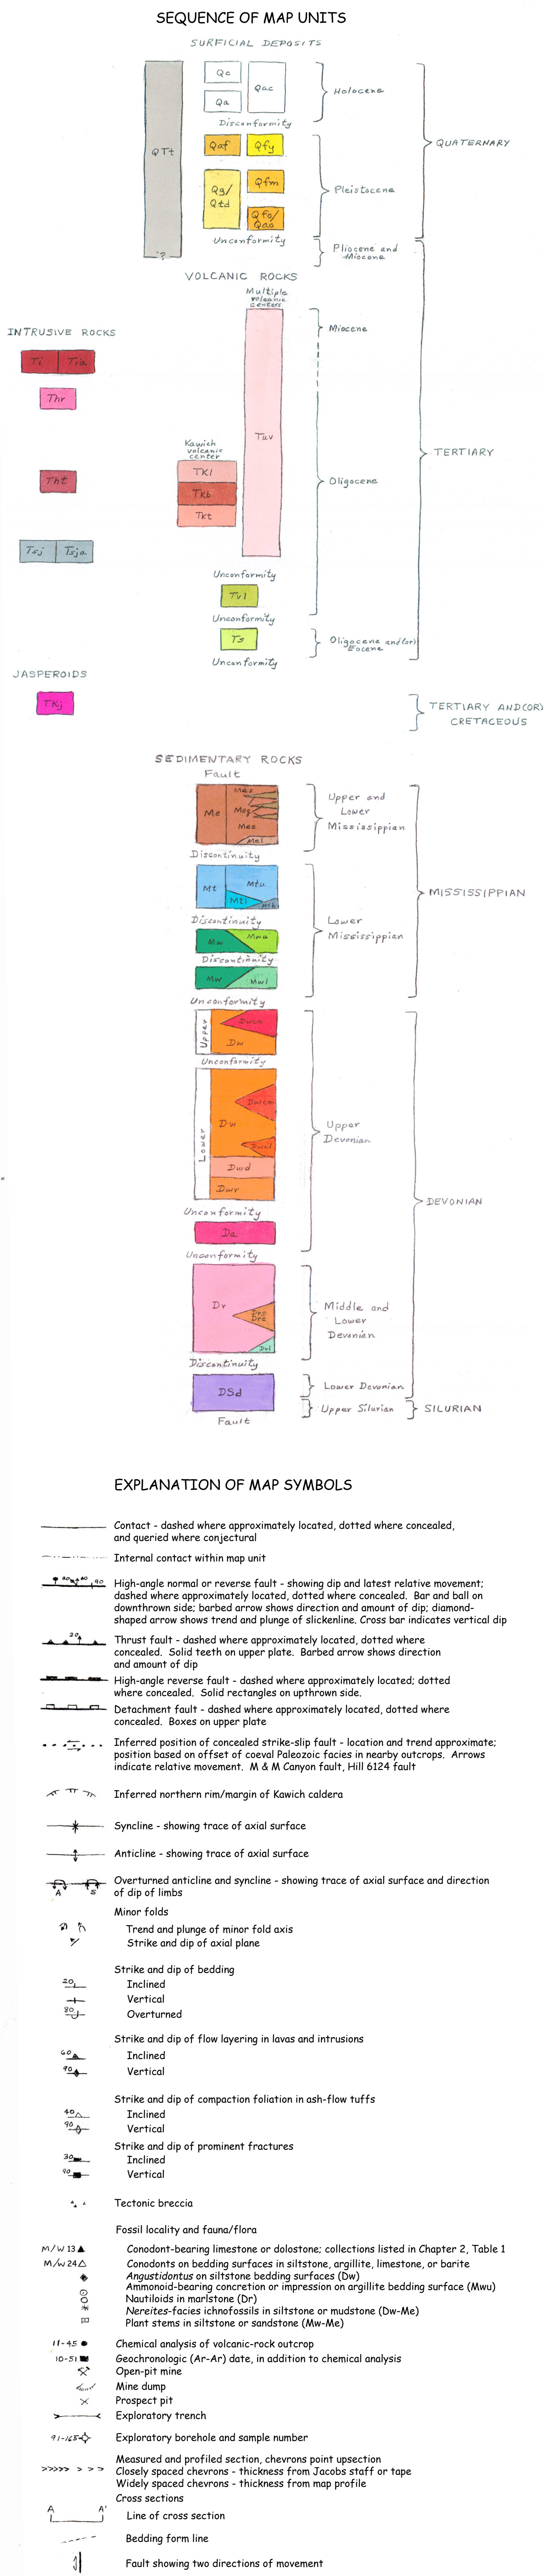

|           |                                                                                                                                      |
|-----------|--------------------------------------------------------------------------------------------------------------------------------------|
| Qa/Qc/Qac | - Active alluvium in washes (Qa) (Holocene); Qc - Hillslope alluvium (Holocene); Qac - Alluvium and colluvium, undivided (Holocene). |
| Qel       | - Alluvial fan (Pleistocene).                                                                                                        |
| Qly       | - Younger alluvial fan (lowest level terrace deposits) (Pleistocene).                                                                |
| Qgr/Qtd   | - Stream-terrace gravels (Qgr) and volcanic detritus (Qtd) (Pleistocene).                                                            |
| Qfm       | - Medial alluvial fan (intermediate level terrace) deposits (Pleistocene).                                                           |
| Qfo/Qca   | - Older alluvial fan (highest level terrace) (Qfo) and pediment deposits (Qca) (Pleistocene).                                        |
| QTr       | - Tufa/travertine deposits (Holocene to Miocene).                                                                                    |
| Ti/Tia    | - Altered tonalite dikes and sills (T1) (Neogene); Tia - Intensely altered felsic dikes.                                             |
| Thr       | - Rhyolite of Highway 6 (upper Oligocene).                                                                                           |
| ThT       | - Tonalite of Highway 6 (upper Oligocene).                                                                                           |
| ThL       | - Lithic tuff of Kawich caldera (upper Oligocene).                                                                                   |
| Tbk       | - Silicified-tuff breccia of Kawich caldera (upper Oligocene).                                                                       |
| Tkt       | - Biotite tuff of Kawich caldera (upper Oligocene).                                                                                  |

|        |                                                                                                                                             |
|--------|---------------------------------------------------------------------------------------------------------------------------------------------|
| TsJ    | TsJ <sub>o</sub> - Skjopsack tonalite/dacite to diorite/andesite (TsJ <sub>o</sub> (lower Oligocene). TsJ <sub>o</sub> - Intensely altered. |
| Tuv    | Tuv - Undifferentiated volcanic rocks (Miocene and Oligocene). Tuv <sub>g</sub> - local conglomerate                                        |
| Tvl    | Tvl - Volcaniclastic fluvial-lacustrine deposits and bedded tuffs (lower Oligocene).                                                        |
| Ts     | Ts - Tuffaceous deposits (lower Oligocene and [or] Eocene).                                                                                 |
| TJk    | TJk - Jasperoid (lower Tertiary or Cretaceous).                                                                                             |
| Me/Ms  | Me/Ms - Eleona Formation, undivided (Me) (Upper and Lower Mississippian); Mes - Siltstone and mudstone (Upper and Lower Mississippian).     |
| Meq    | Meq - Quartzite and conglomerate of Eleona Formation (Upper and Lower Mississippian).                                                       |
| MeL    | MeL - Lowermost clastic unit of Eleona Formation (Lower Mississippian).                                                                     |
| Mt/Mtu | Mt/Mtu - Tripion Pass Limestone, undivided (Mt) (Lower Mississippian); Mtu - Upper unit of upper member (Lower Mississippian).              |
| MtL    | MtL - Lower unit of upper member of Tripion Pass Limestone (Lower Mississippian).                                                           |
| MtB    | MtB - Lower (basal) member of Tripion Pass Limestone (Lower Mississippian).                                                                 |
| Mw     | Mw - Webb Formation, undivided (Lower Mississippian).                                                                                       |
| Nwu    | Nwu - Upper member of siliceous argillite-siltite and chert of Webb Formation (Lower Mississippian).                                        |

|         |                                                                                                                                         |
|---------|-----------------------------------------------------------------------------------------------------------------------------------------|
| Mwl     | - Lower member of chert and argillite of Webb Formation (Lower Mississippian).                                                          |
| Dw/Dwc  | - Woodruff Formation, undivided (Dw) (Upper Devonian); Dwc - Un differentiated chert and silstone units of Woodruff Formation.          |
| Dwcw    | - Upper chert and silstone unit of Woodruff Formation (Upper Devonian).                                                                 |
| Dwcw    | - Middle chert and silstone unit of Woodruff Formation (Upper Devonian).                                                                |
| Dwcl    | - Lower chert and silstone unit of Woodruff Formation (Upper Devonian).                                                                 |
| Dwd     | - Pale-red unit of Woodruff Formation (Upper Devonian).                                                                                 |
| Dwr     | - Ribbon chert unit of Woodruff Formation (Upper Devonian).                                                                             |
| Da      | - Alama Breccia (Upper Devonian).                                                                                                       |
| Dr      | - Warm Springs Formation, undivided (Middle and Lower Devonian).                                                                        |
| Dr3/DrC | - Sandy limestone with silstone partings and some chert of Warm Springs Formation (Dr3) (Middle or Lower Devonian); DrC - Bedded chert. |
| Dnl     | - Sandy limestone and dolomitic limestone of Warm Springs Formation (Lower Devonian).                                                   |
| Dsd     | - Dolostone, undivided (Devonian and Silurian).                                                                                         |

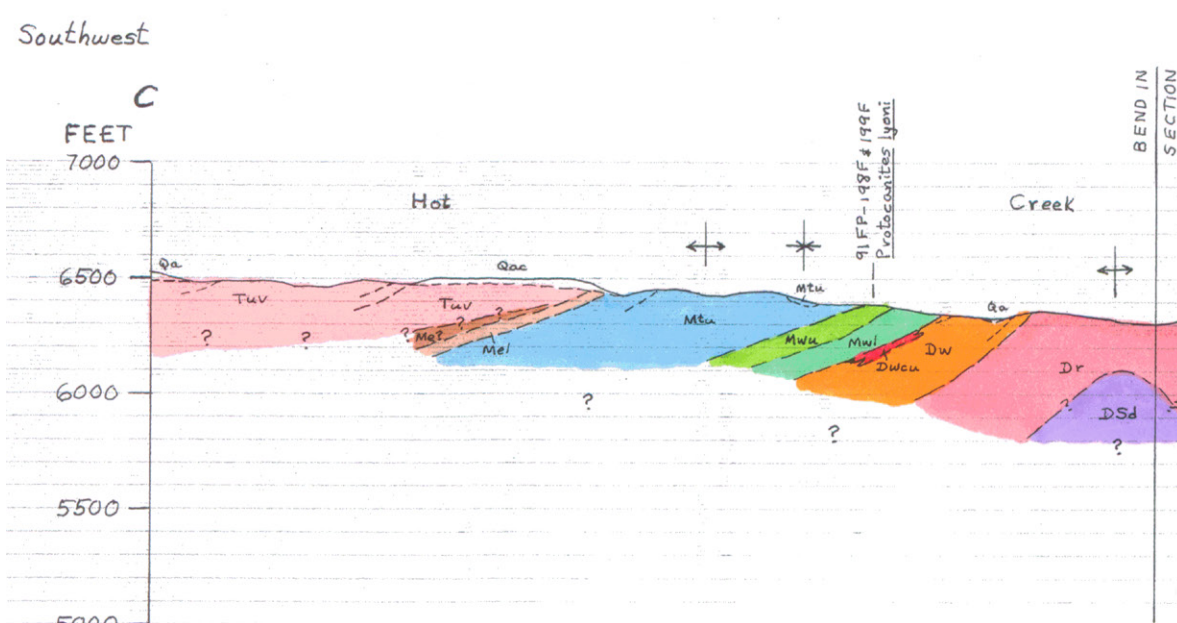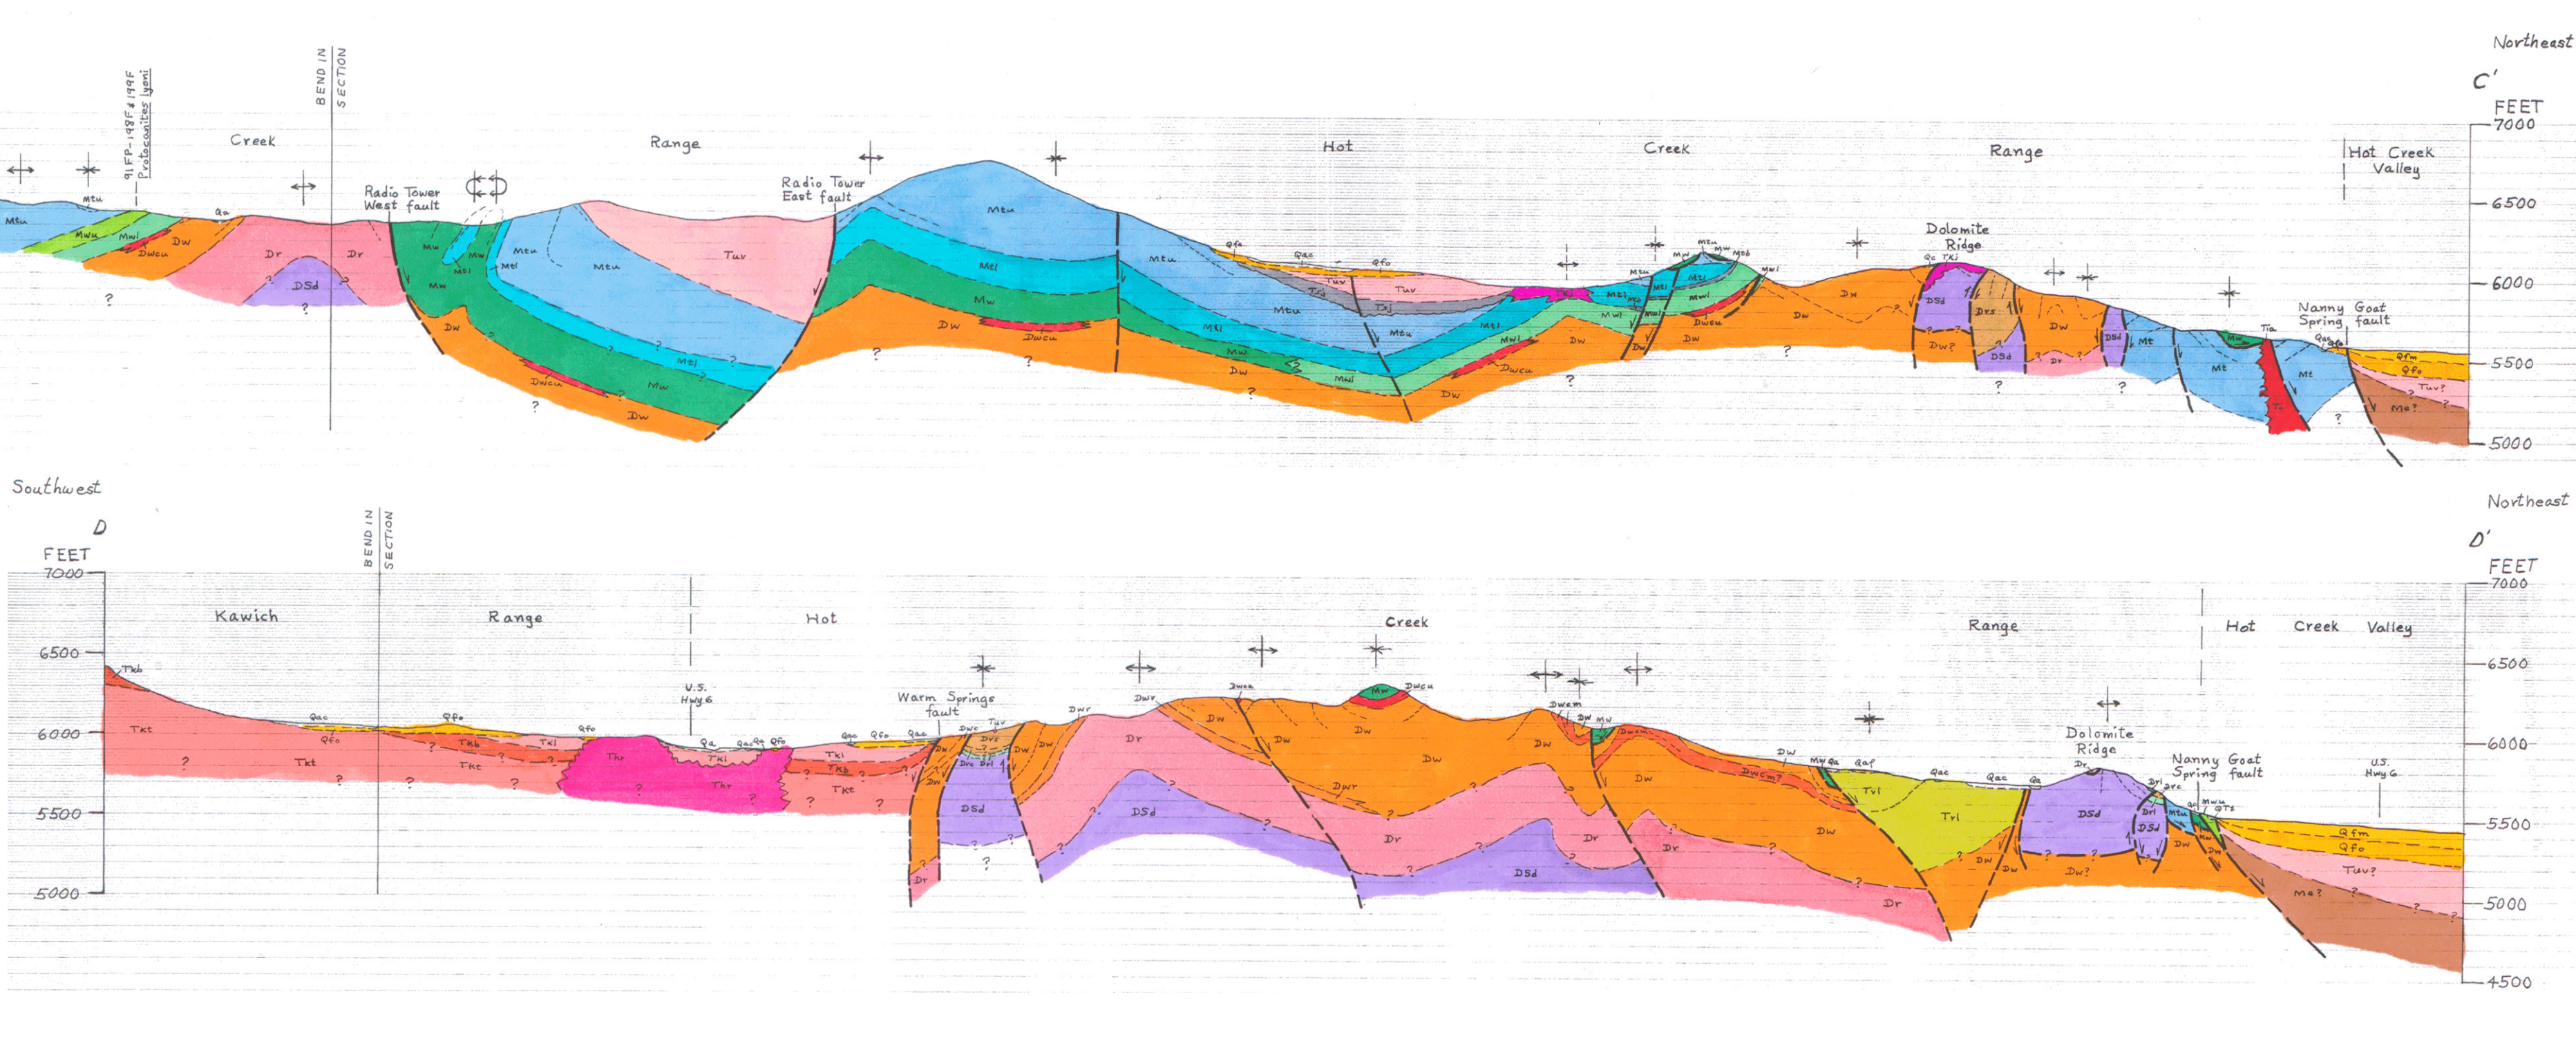

Supplement: Supplementary file 1 [file 23299841]
